# Supplementary material for: The First Modern Human Dispersals across Africa
Source: PLOS journal article supplement (doi:10.1371/journal.pone.0080031), 2013-11-13

Figure S1. Geographic distribution of the new whole mtDNA genomes produced in this study. Colors relate to the geographic sub-divisions used in the analysis (yellow for Central/West Africa, blue for East Africa and red for South Africa).

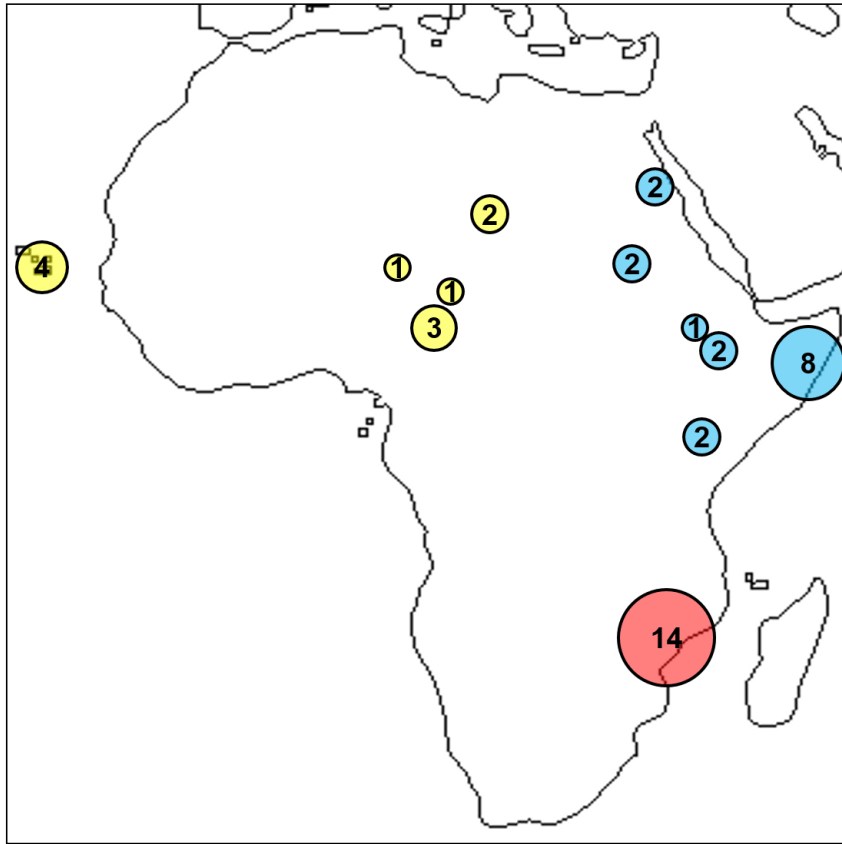

Supplement: S1 (10.1371/journal.pone.0080031.s001) [file journal.pone.0080031.s001]
